# Supplementary material
Source: PubMed Central journal article supplement (PMC3567211)
Supplement: NIHMS425278-supplement-1_si_001.pdf [file NIHMS425278-supplement-1_si_001.pdf]

**Supplementary Materials for**

**Correlation of Local Effects of DNA Sequence and Position of Beta-Alanine  
Inserts with Polyamide-DNA Complex Binding Affinities and Kinetics**

Shuo Wang,<sup>†</sup> Rupesh Nanjunda,<sup>†</sup> Karl Aston,<sup>§</sup> James K. Bashkin,<sup>§\*</sup> W. David Wilson<sup>†\*</sup>

<sup>†</sup> Department of Chemistry, Georgia State University, Atlanta, GA 30303, USA

<sup>§</sup> Department of Chemistry & Biochemistry, Center for Nanoscience, University of Missouri-St.  
Louis, St. Louis, MO 63121, USA

\* Correspondence may be addressed to either of these authors:

Tel: +1.404.413.5503; Fax: +1.404.413.5505. Email: wdw@gsu.edu

Tel: +1.314.516.7352; Fax: +1.314.516.5342. Email: bashkinj@umsl.edu

## Materials and Methods

### Chemical Characterization of KA1055, dImImPyPy $\gamma$ PyIm $\beta$ Py $\beta$ Dp

**HPLC/Mass Spectrometry (HRMS)** ( $MS^n$  ESI $^+$ ) calculated for  $C_{54}H_{70}N_{21}O_{10}$   $MH^+$  1172.56145; found 1172.55845. Elemental analysis calculated for  $KA1055 \cdot 3TFA \cdot 7H_2O$ ,  $C_{60}H_{86}N_{21}O_{23}F_9$ : C, 43.93%; H, 5.28%; F, 10.42; N, 17.93%; found: C, 44.20%; H, 5.21%; F, 10.00; N, 17.92%.

**NMR** conditions and descriptions: 500 or 600 MHz referenced to residual solvent, DMSO- $d^6$  or MeOH- $d^4$ , temp (500 MHz = 27 °C, 600 MHz = 25°C), ex. indicate protons exchangeable in MeOH- $d^4$  or  $D_2O$ .

**$^1H$  NMR** (600 MHz, DMSO- $d^6$ ) 10.33 (s, 1H, ex.), 10.32 (s, 1H, ex.), 9.93 (s, 1H, ex.), 9.88 (s, 1H, ex.), 9.83 (s, 1H, ex.), 9.75 (s, 1H, ex.), 9.23 (brs, 1H, ex.), 8.03 (m, 3H, ex.), 7.92 (t,  $J=5.9$ Hz, 1H, ex), 7.58 (s, 1H), 7.50 (s, 1H), 7.47 (d,  $J=0.5$ Hz, 1H), 7.282 (d,  $J=1.8$ Hz, 1H), 2.276 (d,  $J=1.8$ Hz, 1H), 7.18 (d,  $J=1.7$ Hz, 1H), 7.15 (d,  $J=1.8$ Hz, 1H), 7.10 (d,  $J=1.7$ Hz, 1H), 7.09 (d,  $J=1.2$ Hz, 1H), 6.91 (d,  $J=1.8$ Hz, 2H), 6.90 (d,  $J=1.8$ Hz, 2H), 6.67 (d,  $J=2.3$ Hz, 1H), 4.016 (s, 3H), 4.014 (s, 3H), 3.94 (s, 3H), 3.85 (s, 3H), 3.82 (s, 3H), 3.81 (s, 3H), 3.78 (s, 3H), 3.52 (m, 2H), 3.36 (m, 2H), 3.21 (m, 2H), 3.10 (m, 2H), 2.99 (m, 2H), 2.73 (d,  $J=4.7$ Hz, 6H), 2.52 (t,  $J=6.4$ Hz, 2H), 2.33 (t,  $J=7.0$ Hz, 2H), 2.28 (t,  $J=7.1$ Hz, 2H), 1.79 (m, 2H), 1.73 (m, 2H).

**$^1H$  NMR** (500 MHz, DMSO- $d^6$ ) 10.35 (s, 1H, ex.), 10.33 (s, 1H, ex.), 9.94 (s, 1H, ex.), 9.89 (s, 1H, ex.), 9.84 (s, 1H, ex.), 9.74 (s, 1H, ex.), 9.23 (brs, 1H, ex.), 8.04 (m, 3H, ex.), 7.92 (t,  $J=6.0$ Hz, 1H, ex.), 7.58 (s, 1H), 7.50 (s, 1H), 7.47 (d,  $J=1.0$ Hz, 1H), 7.284 (d,  $J=1.9$ Hz, 1H), 7.281 (d,  $J=1.6$ Hz, 1H), 7.19 (d,  $J=1.9$ Hz, 1H), 7.16 (d,  $J=1.9$ Hz, 1H), 7.11 (d,  $J=1.9$ Hz, 1H), 7.09 (d,

J=1.0Hz, 1H), 6.91 (d, J=1.9Hz, 2H), 6.90 (d, J=1.9Hz, 2H), 6.67 (d, J=1.9Hz, 1H), 4.014 (s, 3H), 4.012 (s, 3H), 3.94 (s, 3H), 3.85 (s, 3H), 3.82 (s, 3H), 3.81 (s, 3H), 3.78 (s, 3H), 3.52 (m, 2H), 3.36 (m, 2H), 3.21 (m, 2H), 3.10 (m, 2H), 2.99 (m, 2H), 2.73 (d, J=4.7Hz, 6H), 2.33 (t, J=7.3Hz, 2H), 2.28 (t, J=7.3Hz, 2H), 1.78 (m, 2H), 1.72 (m, 2H).

**<sup>1</sup>H NMR** (500 MHz, DMSO-*d*<sup>6</sup> plus D<sub>2</sub>O) 7.57 (s, 1H), 7.48 (s, 1H), 7.45 (d, J=0.7Hz, 1H), 7.27 (d, J=1.6Hz, 1H), 7.26 (d, J=1.9Hz, 1H), 7.17 (d, J=1.9Hz, 1H), 7.13 (d, J=1.9Hz, 1H), 7.10 (d, J=1.0Hz, 1H), 7.09 (d, J=1.9Hz, 1H), 6.90 (d, J=1.9Hz, 2H), 6.89 (d, J=1.9Hz, 2H), 6.66 (d, J=1.9Hz, 1H), 4.003 (s, 3H), 3.999 (s, 3H), 3.93 (s, 3H), 3.84 (s, 3H), 3.81 (s, 3H), 3.80 (s, 3H), 3.76 (s, 3H), 3.35 (m, 2H), 3.20 (m, 2H), 3.09 (m, 2H), 2.98 (m, 2H), 2.72 (s, 6H), 2.33 (t, J=7.0Hz, 2H), 2.28 (t, J=7.3Hz, 2H), 1.78 (m, 2H), 1.72 (m, 2H).

**<sup>1</sup>H NMR** (500 MHz, MeOH-*d*<sup>4</sup>) 7.53 (s, 1H), 7.36 (s, 1H), 7.31 (d, J=1.0Hz, 1H), 7.27 (d, J=1.9Hz, 1H), 7.15 (d, J=1.6Hz, 1H), 7.12 (d, J=1.0Hz, 1H), 7.08 (d, J=1.9Hz, 1H), 7.04 (d, J=1.9Hz, 1H), 6.92 (d, J=1.9Hz, 1H), 6.87 (d, J=1.9Hz, 1H), 6.79 (d, J=1.9Hz, 1H), 6.72 (d, J=1.9Hz, 1H), 4.08 (s, 6H), 3.97 (s, 3H), 3.91 (s, 3H), 3.87 (s, 3H), 3.85 (s, 3H), 3.82 (s, 3H), 3.62 (t, J=6.6 Hz, 2H), 3.55 (t, J=6.6Hz, 2H), 3.40 (t, J=6.6Hz, 2H), 3.25 (t, J=6.6Hz, 2H), 3.06 (m, 2H), 2.82 (s, 6H), 2.59 (t, J=6.5Hz, 2H), 2.47 (t, J=6.6Hz, 2H), 2.41 (t, J=7.0Hz, 2H), 1.98 (m, 2H), 1.86 (m, 2H).

Reverse Phase HPLC/mass spectrometry and NMR data are shown for KA1055 (Figures S1-9):

Agilent 1100 HPLC; MSD ESI<sup>+</sup> and diode array detection; column: 70 × 4.6 mm Macherey-

Nagel Nucleodur C18 column; 5 $\mu$  particles; gradient: 5-60% MeCN/water with 0.1% formic acid at 0.5 mL/min; retention time 11.3 min (300 nm).

## Figure Legends

**Figure S1.** HPLC/MS of KA1055: UV/Vis traces at 254, 300 and 220 nm, Total Ion Current (TIC).

**Figure S2.** HPLC/MS of KA1055: Area % at 300 nm

**Figure S3.** Mass spectrum of KA1055 from ESI<sup>+</sup> HPLC/MS showing mono- and di-protonated species, [M+H]<sup>+</sup> and [M+2H]<sup>2+</sup>.

**Figure S4.** Expansion of the mass spectrum of KA1055 for [M+H]<sup>+</sup>.

**Figure S5.** Further expansion of the mass spectrum of KA1055 for [M+H]<sup>+</sup>.

**Figure S6.** <sup>1</sup>H NMR (600 MHz, DMSO-*d*<sup>6</sup>) of KA1055.

**Figure S7.** <sup>1</sup>H NMR (500 MHz, DMSO-*d*<sup>6</sup>) of KA1055.

**Figure S8.** <sup>1</sup>H NMR (500 MHz, DMSO-*d*<sup>6</sup> plus D<sub>2</sub>O) of KA1055.

**Figure S9.** <sup>1</sup>H NMR (500 MHz, MeOH-*d*<sup>4</sup>) of KA1055.

**Figure S10.** Thermal melting curves of the DNA hairpin duplex containing the TGGCTT site in the absence and presence of KA1002, KA1007, KA1055 and KA1039 at 0.5:1, 1:1, 1.5:1 and 2:1 molar ratios of compound to DNA.

**Figure S11.** Mutant DNA sequences of TGGCTT with the hairpin loop underlined.

**Figure S12.** Models of PA binding induced DNA bending. (A) X-ray crystal structure of cyclic eight-ring PA bound to 5'-CCAGTACTGG-3' (PDB 3OMJ, ref. 39.) (B) Docking models of B-

DNA, Glucocorticoid receptor DNA-binding domain (GRDBD)+ DNA, PA+ DNA and PA+ DNA+ GRDBD based on the X-ray crystal structures PDB 3G6P and PDB 3OMJ (ref. 41).

Data File E:\DATA\BACKUP 1-14-11\KA1056\071-0701.D  
Sample Name: KA1055A

=====

|                                                                                                       |                              |
|-------------------------------------------------------------------------------------------------------|------------------------------|
| Acq. Operator : Aston                                                                                 | Seq. Line : 7                |
| Acq. Instrument : Instrument 1                                                                        | Location : Vial 71           |
| Injection Date : 10/29/2010 1:49:53 PM                                                                | Inj : 1                      |
|                                                                                                       | Inj Volume : 10.000 µl       |
| Different Inj Volume from Sequence !                                                                  | Actual Inj Volume : 5.000 µl |
| Acq. Method : C:\CHEM32\1\METHODS\5_60ACN_26_500-2200                                                 |                              |
| Last changed : 10/28/2010 6:10:56 PM by Kevin                                                         |                              |
| Analysis Method : C:\CHEM32\1\METHODS\5_60ACN_6_5_500-2200_ESI+.M                                     |                              |
| Last changed : 6/12/2012 1:18:33 PM                                                                   |                              |
| (modified after loading)                                                                              |                              |
| Method Info : 5 to 60% ACN/0.1% aq. formic acid over 4 min, 2.0 mL/min, 500-2200 MW, ESI+, Analytical |                              |

Sample Info : lyophilized combined lots of PA#3

Additional Info : Peak(s) manually integrated

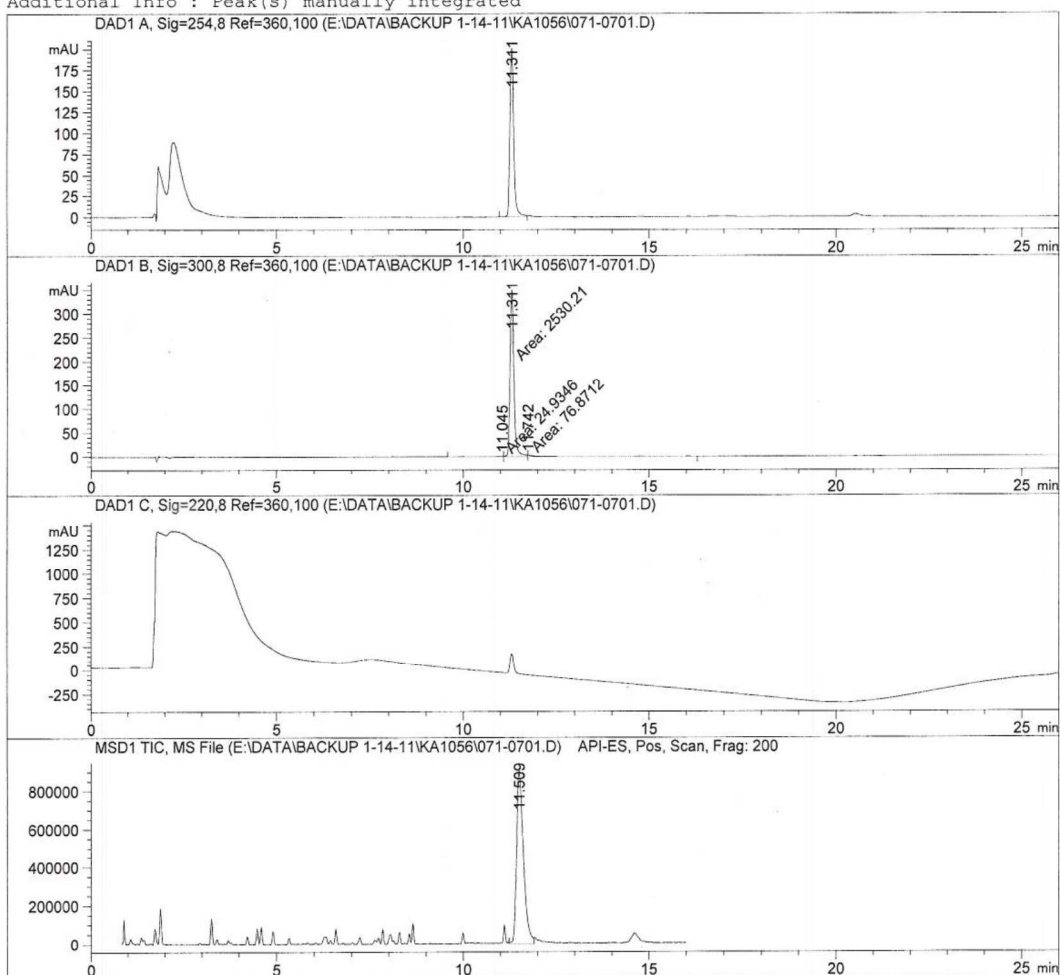

LC1 6/14/2012 1:11:39 PM

Page 1 of 3

Figure S1

=====  
 Area Percent Report  
 =====

Sorted By : Signal  
 Multiplier: : 1.0000  
 Dilution: : 1.0000  
 Use Multiplier & Dilution Factor with ISTDs

Signal 1: DAD1 A, Sig=254,8 Ref=360,100

| Peak #   | RetTime [min] | Type | Width [min] | Area [mAU*s] | Height [mAU] | Area %   |
|----------|---------------|------|-------------|--------------|--------------|----------|
| 1        | 11.311        | BB   | 0.1101      | 1426.93359   | 200.44853    | 100.0000 |
| Totals : |               |      |             | 1426.93359   | 200.44853    |          |

Signal 2: DAD1 B, Sig=300,8 Ref=360,100

| Peak #   | RetTime [min] | Type | Width [min] | Area [mAU*s] | Height [mAU] | Area %  |
|----------|---------------|------|-------------|--------------|--------------|---------|
| 1        | 11.045        | MF   | 0.5239      | 24.93456     | 7.93263e-1   | 0.9474  |
| 2        | 11.311        | MF   | 0.1203      | 2530.20776   | 350.51517    | 96.1320 |
| 3        | 11.742        | FM   | 0.4155      | 76.87117     | 3.08343      | 2.9206  |
| Totals : |               |      |             | 2632.01349   | 354.39186    |         |

**Figure S2**

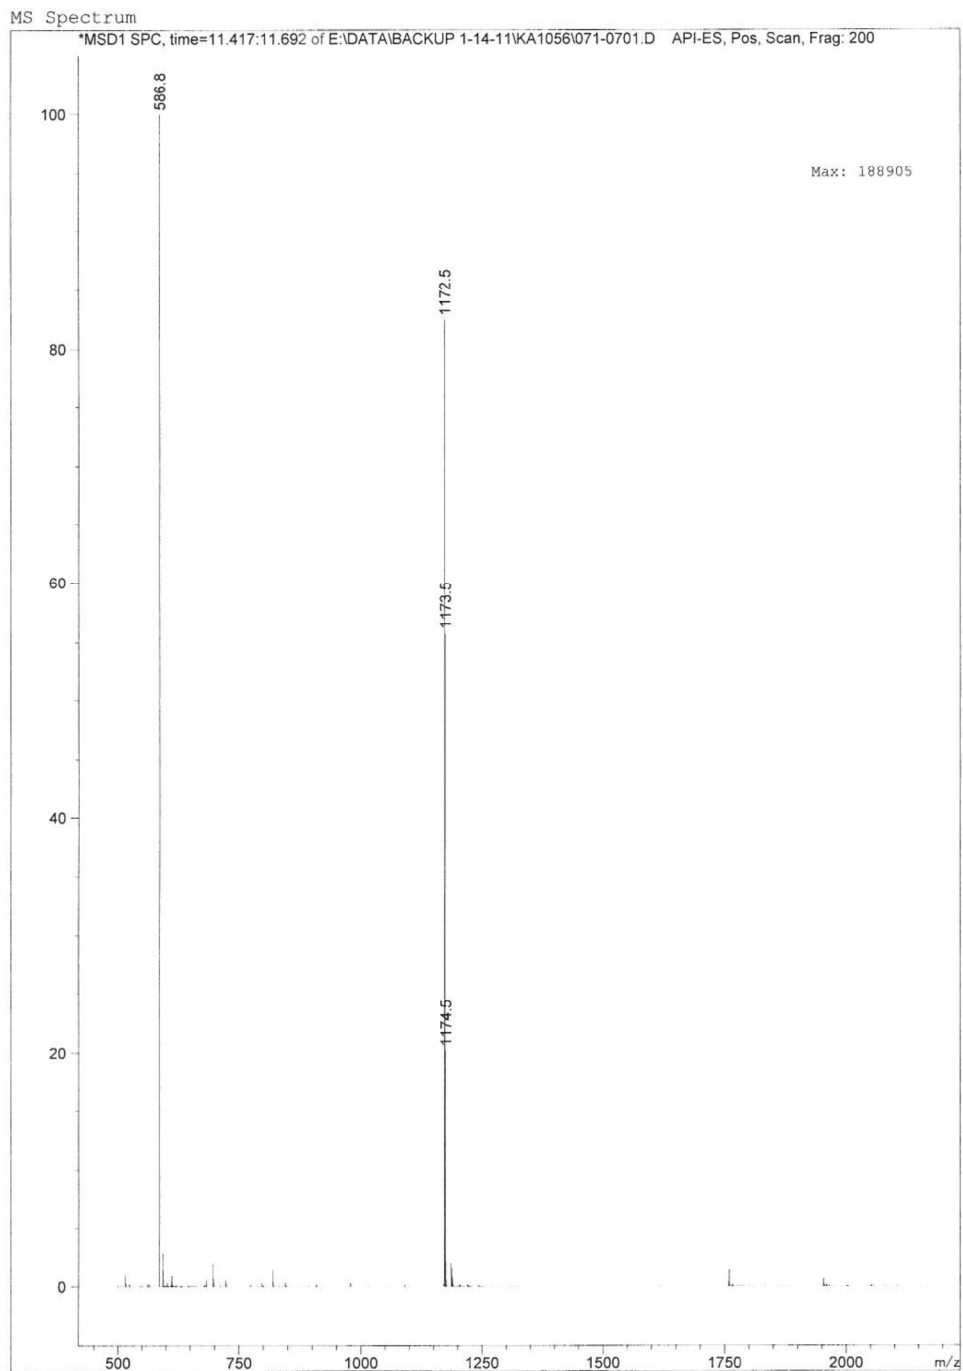

Figure S3



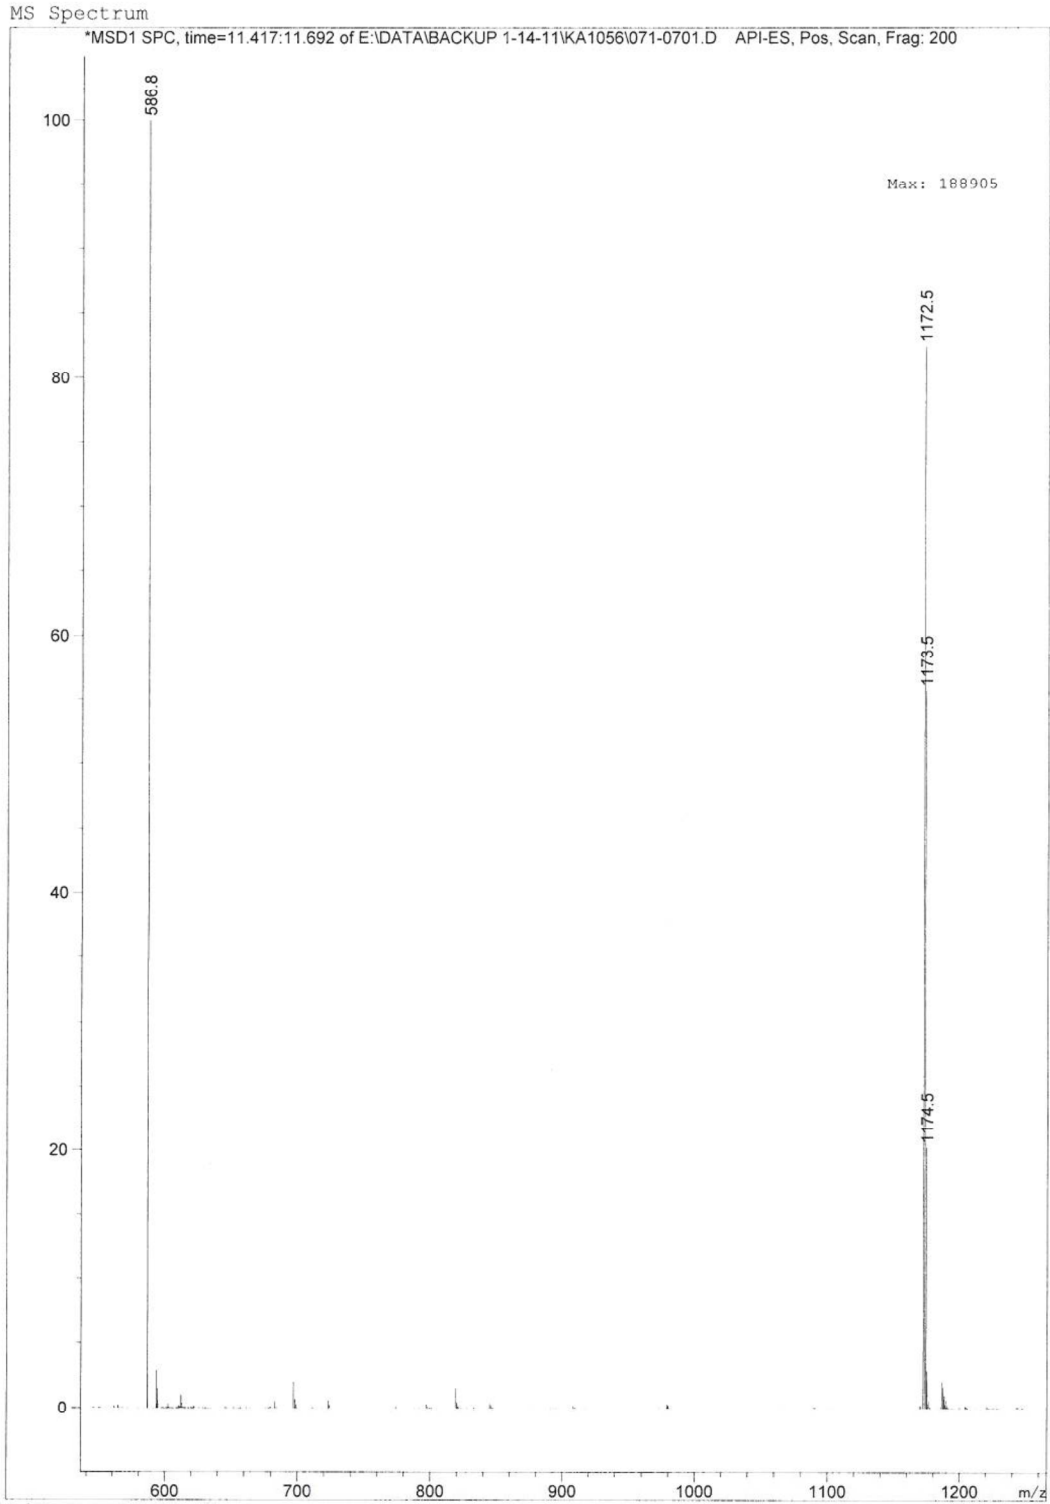

Figure S4

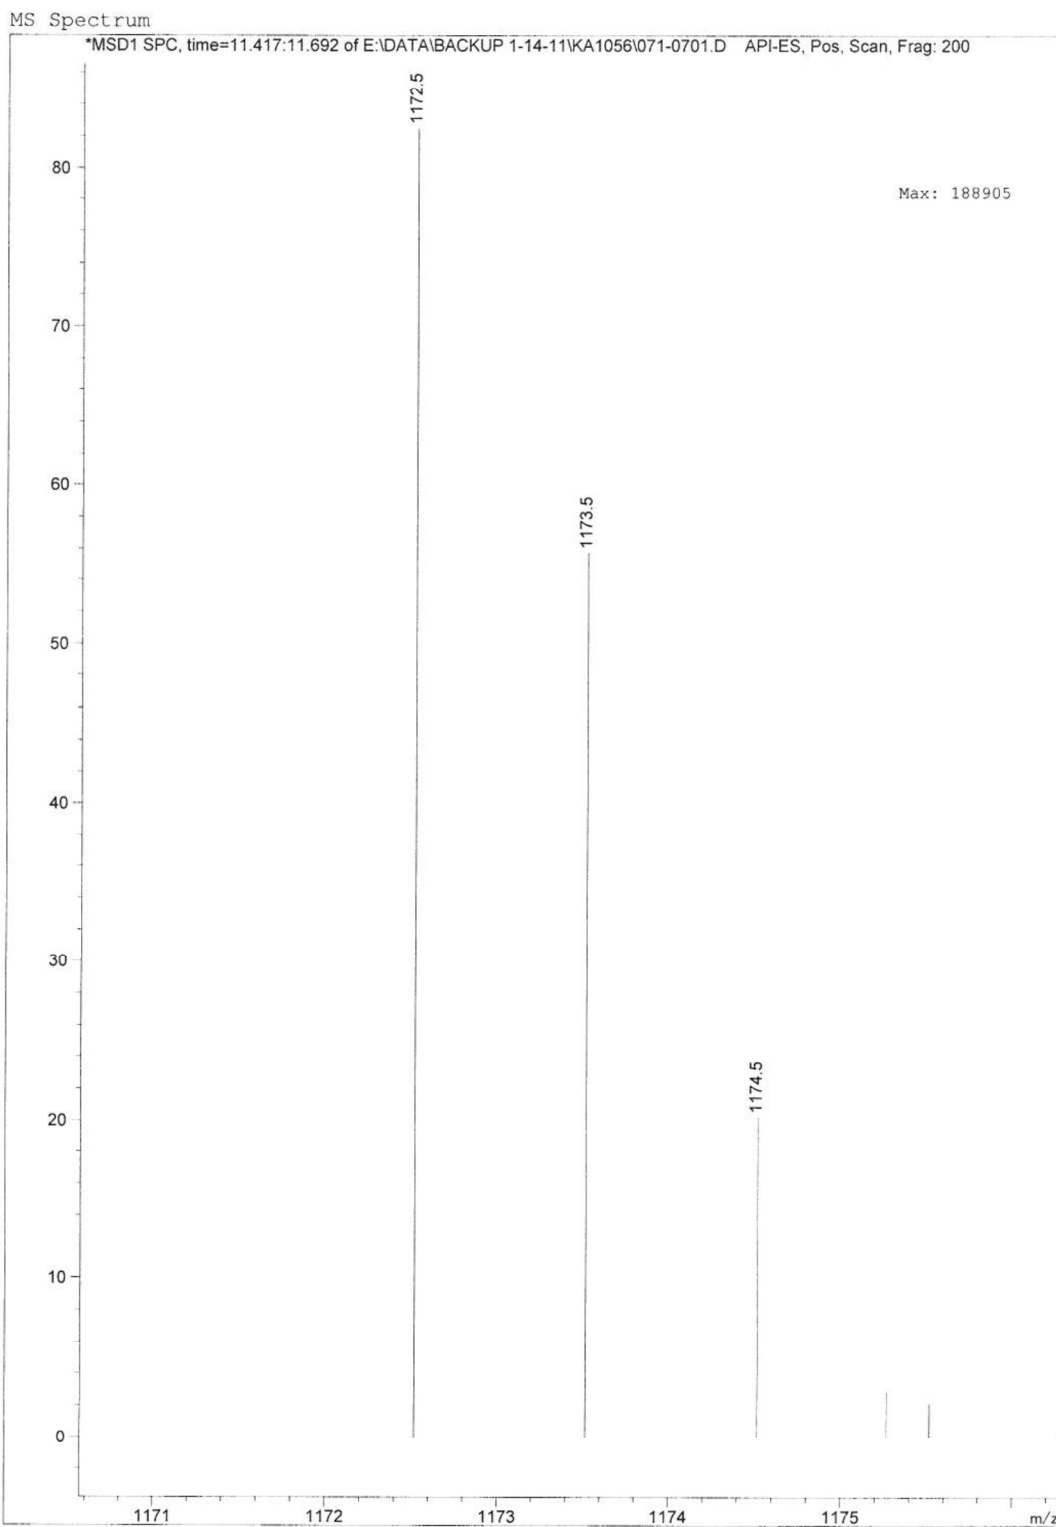

Figure S5

# desImPyPyGammaPyImBetaPyBetaDp

Gradient Shimming

|                        |             |                |                                                                                |                        |             |
|------------------------|-------------|----------------|--------------------------------------------------------------------------------|------------------------|-------------|
| Acquisition Time (sec) | 1.7039      | Comment        | Gradient Shimming                                                              | Date                   | Jul 26 2012 |
| Date Stamp             | Jul 26 2012 | File Name      | \\slit.umsi.edu\deptshare\esh_nmr\data\qien1600\bashkin\KA2056-G-072612_3d\fid |                        |             |
| Frequency (MHz)        | 599.78      | Nucleus        | 1H                                                                             | Number of Transients   | 64          |
| Points Count           | 16384       | Pulse Sequence | s2pu1                                                                          | Receiver Gain          | 50.00       |
| Spectrum Offset (Hz)   | 3609.1106   | Spectrum Type  | STANDARD                                                                       | Sweep Width (Hz)       | 9615.38     |
|                        |             |                |                                                                                | Original Points Count  | 16384       |
|                        |             |                |                                                                                | Solvent                | DMSO-d6     |
|                        |             |                |                                                                                | Temperature (degree C) | 25.000      |

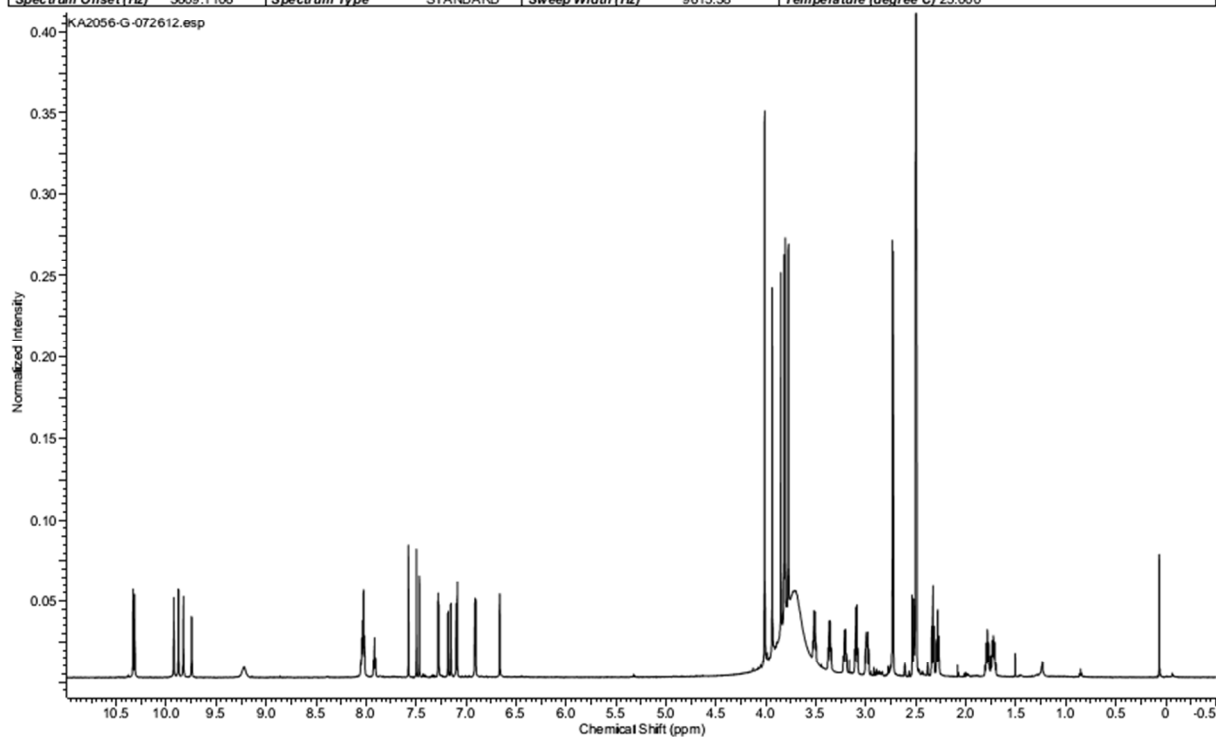

**Figure S6**

desImPyPyGammaPylmBetaPyBetaDp

KA2056G 5.5mg-0.6mL DMSO-d6

|                        |                      |                   |                                                         |                        |                      |
|------------------------|----------------------|-------------------|---------------------------------------------------------|------------------------|----------------------|
| Acquisition Time (sec) | 3.1457               | Comment           | KA2056G 5.5mg-0.6mL DMSO-d6                             | Date                   | 25 Jun 2012 19:14:08 |
| Date Stamp             | 25 Jun 2012 19:14:08 | File Name         | \\134.124.122.67\data\ARX500\bashkin\nmr\KA2056G1\1.fid | Origin                 | spec1                |
| Frequency (MHz)        | 500.13               | Nucleus           | 1H                                                      | Number of Transients   | 531                  |
| Original Points Count  | 32768                | Owner             | root                                                    | Points Count           | 32768                |
| Receiver Gain          | 2048.00              | SW(cyclical) (Hz) | 10416.67                                                | Solvent                | DMSO-d6              |
| Spectrum Type          | STANDARD             | Sweep Width (Hz)  | 10416.35                                                | Temperature (degree C) | 27.000               |
|                        |                      |                   |                                                         | Spectrum Offset (Hz)   | 3080.5850            |

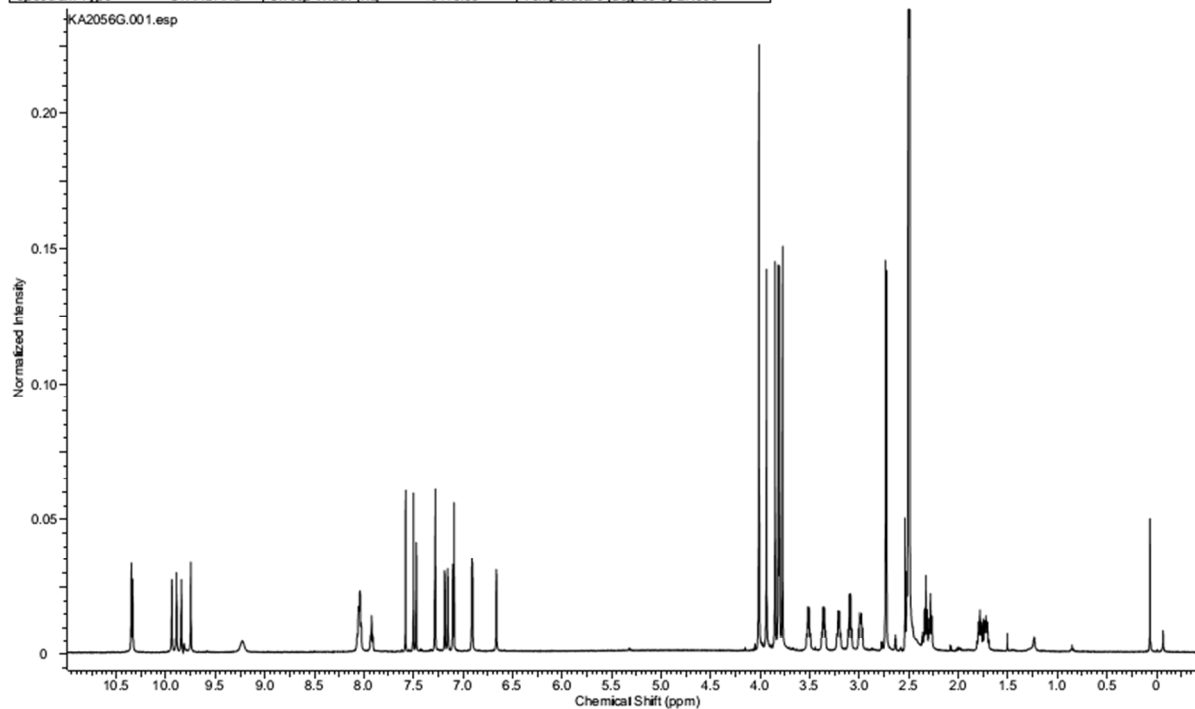

Figure S7

desImPyPyGammaPylmBetaPyBetaDp

KA2056G 2uL D2O added

|                        |                      |                   |                                                         |                        |                      |
|------------------------|----------------------|-------------------|---------------------------------------------------------|------------------------|----------------------|
| Acquisition Time (sec) | 3.1457               | Comment           | KA2056G 2uL D2O added                                   | Date                   | 31 Jul 2012 16:46:56 |
| Date Stamp             | 31 Jul 2012 16:46:56 | File Name         | \\134.124.122.67\data\ARX500\ba\kin\mr\KA2056G-D2O\116d | Origin                 | spect                |
| Frequency (MHz)        | 500.13               | Nucleus           | 1H                                                      | Number of Transients   | 1732                 |
| Original Points Count  | 32768                | Owner             | root                                                    | Points Count           | 32768                |
| Receiver Gain          | 1024.00              | SW(cyclical) (Hz) | 10416.67                                                | Solvent                | DMSO-d6              |
| Spectrum Type          | STANDARD             | Sweep Width (Hz)  | 10416.35                                                | Temperature (degree C) | 27.000               |
|                        |                      |                   |                                                         | Spectrum Offset (Hz)   | 3080.2747            |

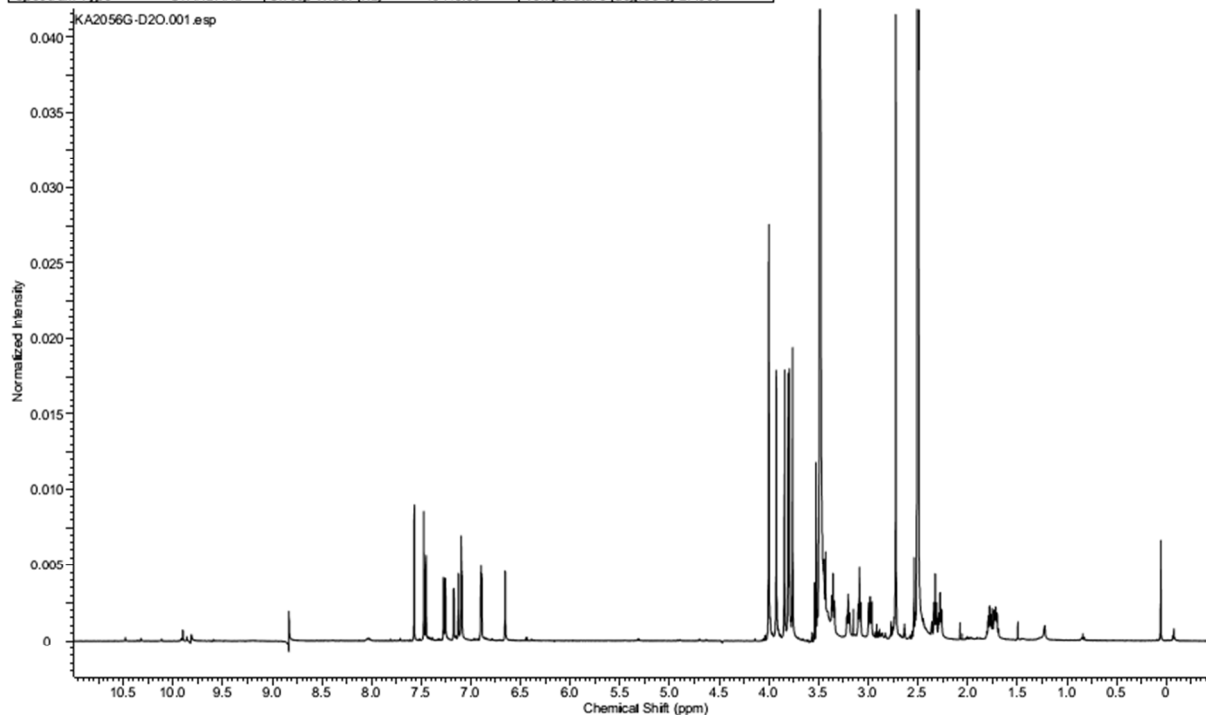

Figure S8

desImPyPyGammaPylmBetaPyBetaDp

KA1055A run in CD3OD

|                        |                      |                   |                                                             |                      |        |                        |           |
|------------------------|----------------------|-------------------|-------------------------------------------------------------|----------------------|--------|------------------------|-----------|
| Acquisition Time (sec) | 3.1457               | Comment           | KA1055A run in CD3OD                                        |                      | Date   | 15 May 2012 12:37:20   |           |
| Date Stamp             | 15 May 2012 12:37:20 | File Name         | \\134.124.122.67\data\ARX500\bashkin\mr\KA1055A-CD3OD\1\fid |                      | Origin | spect                  |           |
| Frequency (MHz)        | 500.13               | Nucleus           | 1H                                                          | Number of Transients | 1502   | Pulse Sequence         | zg30      |
| Original Points Count  | 32768                | Owner             | root                                                        | Points Count         | 32768  | Spectrum Offset (Hz)   | 3076.8818 |
| Receiver Gain          | 1430.00              | SW(cyclical) (Hz) | 10416.67                                                    | Solvent              | MeOH   | Temperature (degree C) | 27.000    |
| Spectrum Type          | STANDARD             | Sweep Width (Hz)  | 10416.35                                                    |                      |        |                        |           |

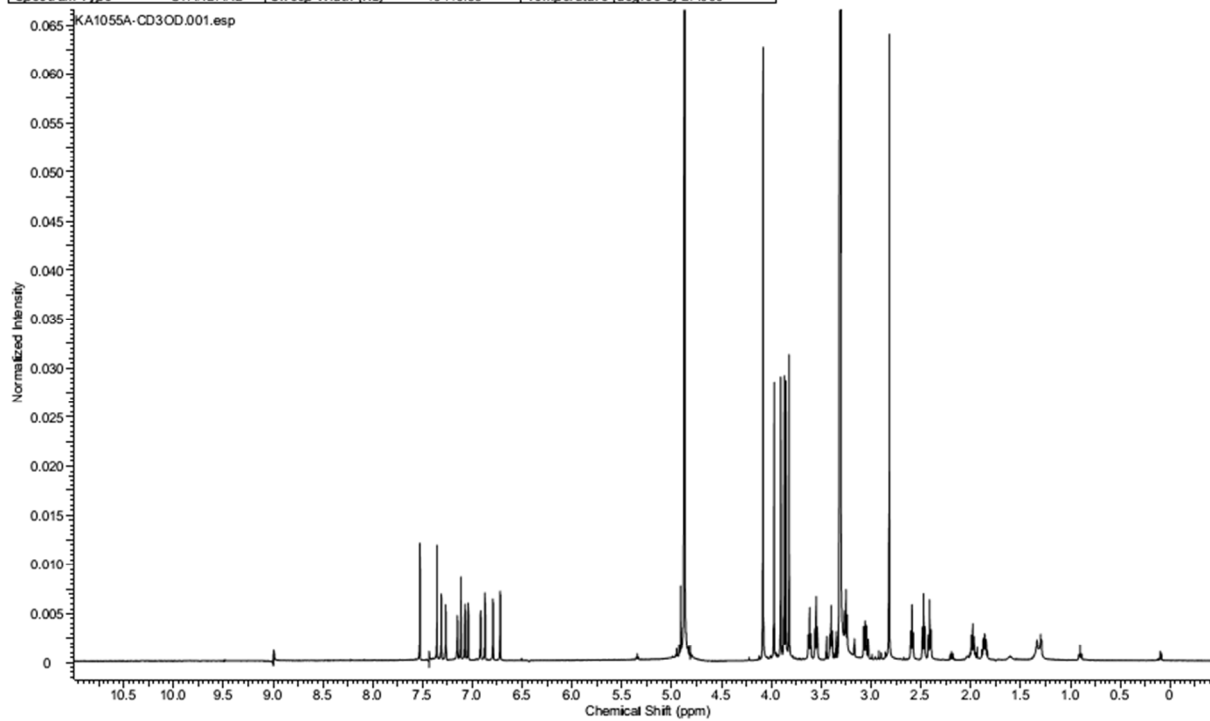

Figure S9

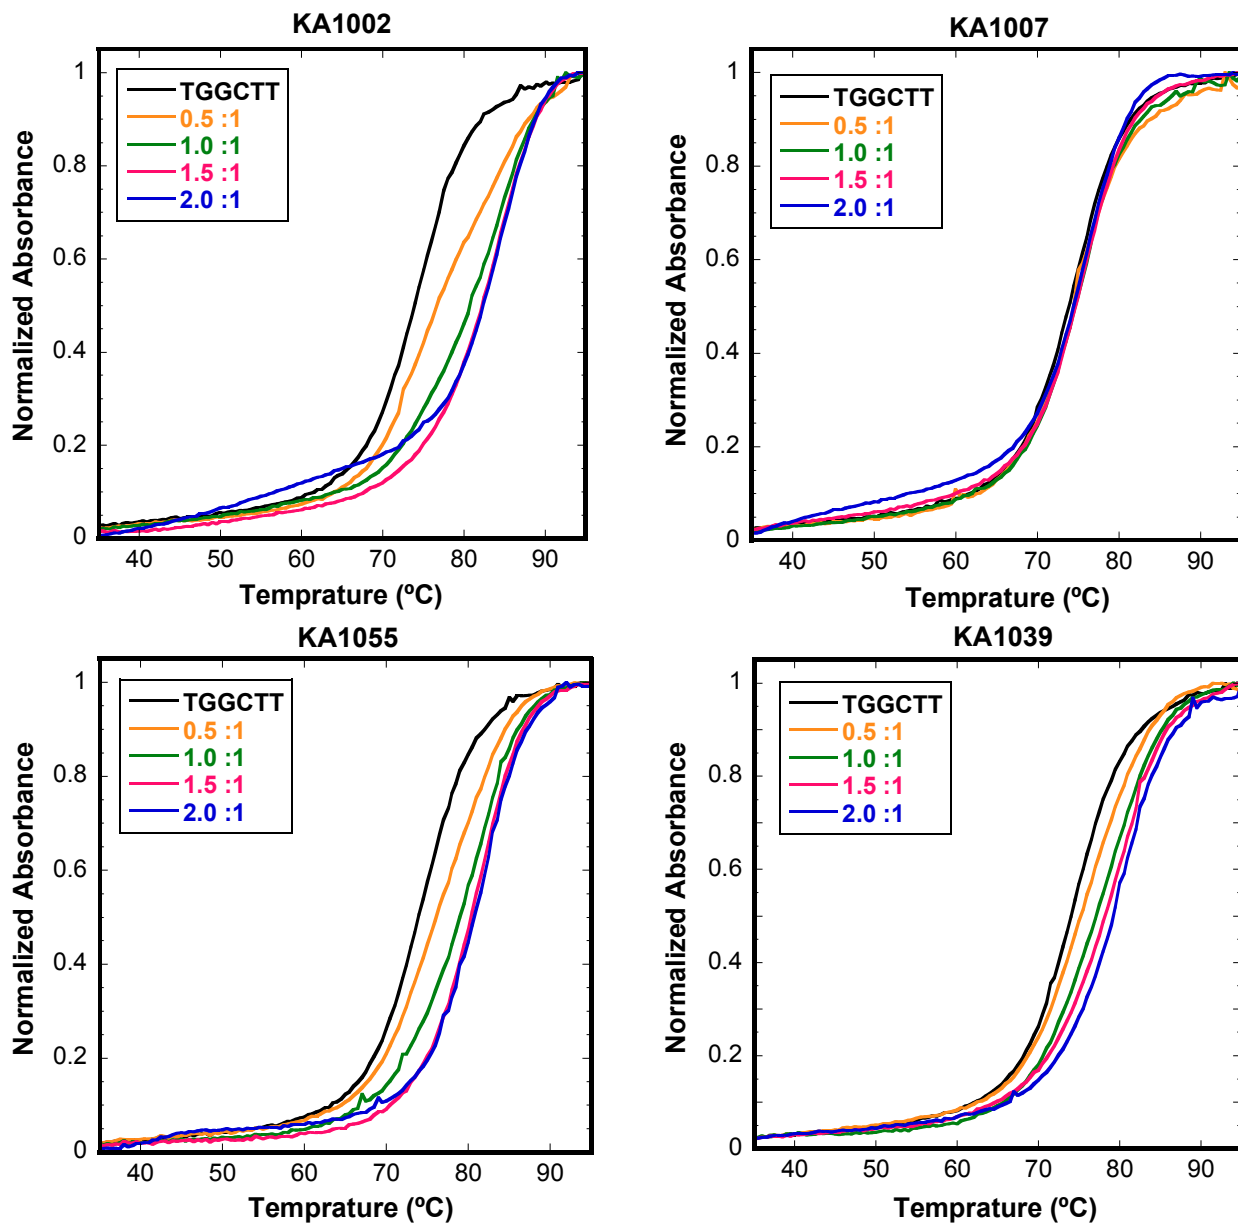

Figure S10

Original sequence:

5' -CCT **TGGCTT** CTTTTGAAGCCAAGG-3'

Mutant sequences:

1. 5' -CCT **TGCCTT** CTTTTGAAG **G**CCAAGG-3'

2. 5' -CCT **TGTCTT** CTTTTGAAG **A**CCAAGG-3'

3. 5' -CCT **TGGGTT** CTTTTGAAG **C**CCAAGG-3'

4. 5' -CCT **TGGCCT** CTTTTGAAG **G**CCAAGG-3'

5. 5' -CCT **TGATTT** CTTTTGAAG **A**CCAAGG-3'

Figure S11



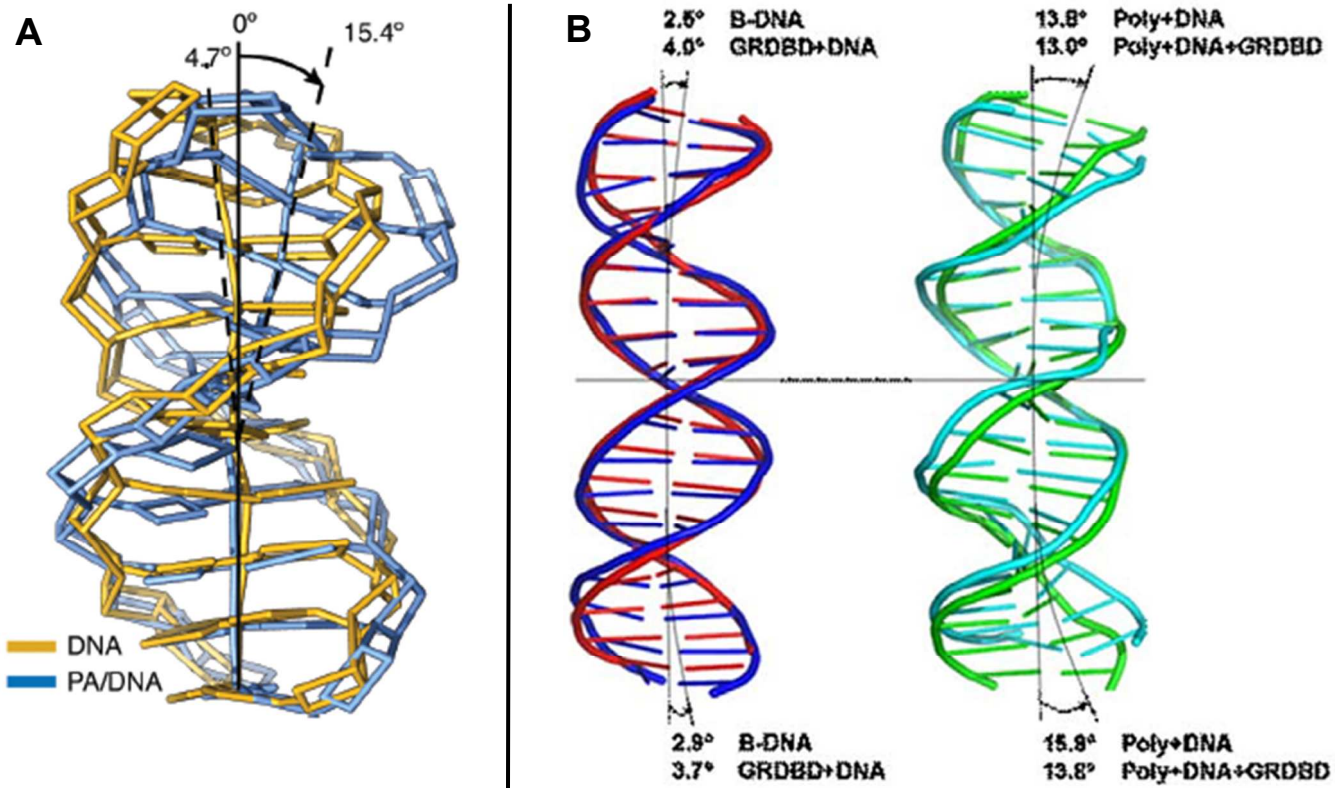

Figure S12
